# Supplementary material for: Genetic diversity of the NE Atlantic sea urchin Strongylocentrotus droebachiensis unveils chaotic genetic patchiness possibly linked to local selective pressure
Source: PubMed Central journal article supplement (PMC4722066; doi:10.1007/s00227-015-2801-y), 2016-01-22

K. M. Norderhaug<sup>1,2</sup>, M.B. Anglès d'Auriac<sup>1</sup>, C. W. Fagerli<sup>1</sup>, H. Gundersen<sup>1</sup>, H. Christie<sup>1</sup>, K. Dahl<sup>3</sup>, A. Hobæk<sup>4,5</sup>,

<sup>1</sup>Norwegian Institute for Water Research (NIVA), Gaustadallèen 21, 0349 Oslo, Norway.

<sup>2</sup>Department of Biosciences, University of Oslo, P.O. Box 1066, Blindern, 0316 Oslo, Norway.

<sup>3</sup>Department of Bioscience, Marine Diversity and Experimental Ecology, University of Aarhus, Frederiksborgvej 399, 4000 Roskilde, Denmark.

<sup>4</sup>Norwegian Institute for Water Research (NIVA), Region West, Thormøhlensgt. 53D, 5006 Bergen, Norway

<sup>5</sup>Department of Biology, University of Bergen, P.O. Box 7803, 5020 Bergen, Norway

**Genetic diversity of the NE Atlantic sea urchin *Strongylocentrotus droebachiensis* unveils chaotic genetic patchiness possibly linked to local selective pressure**

Supplement 1. Allele frequencies of the loci used in the study.

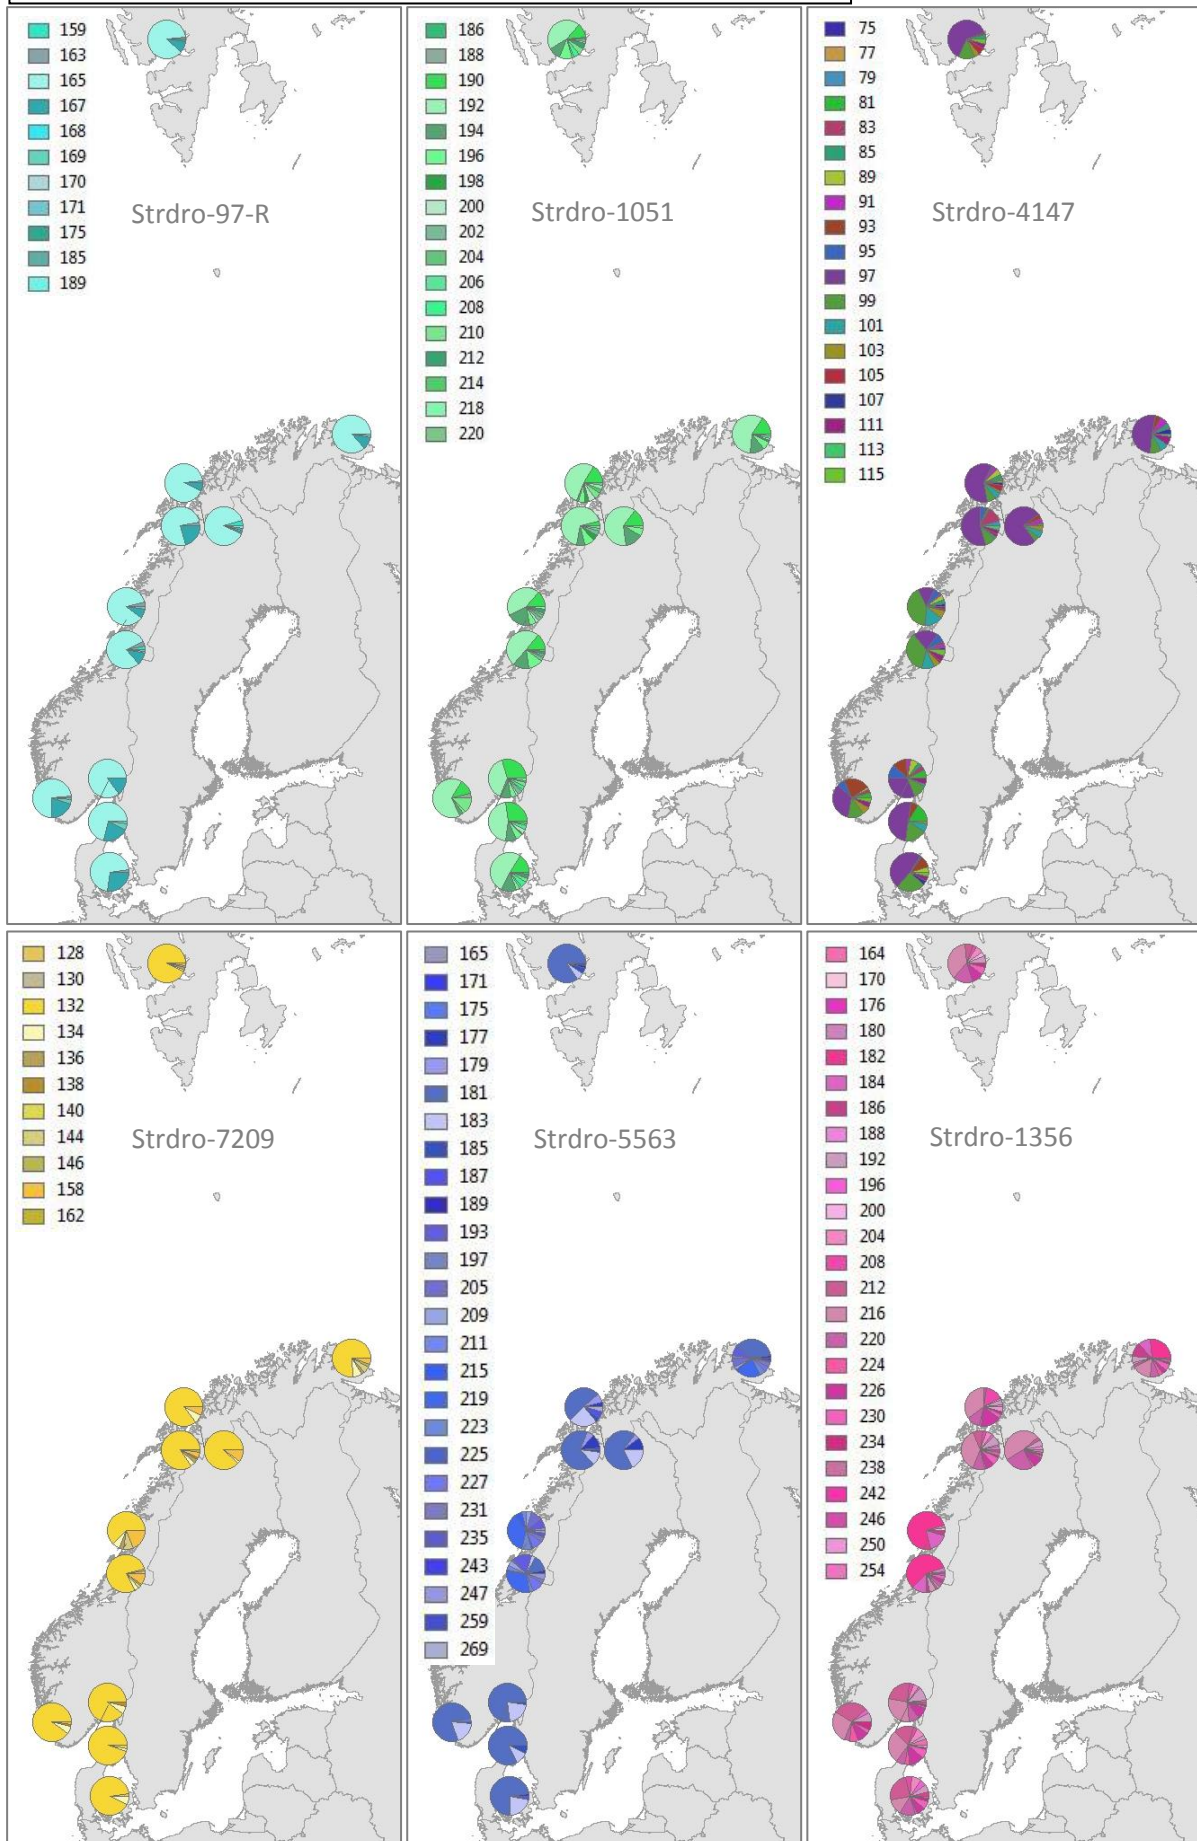

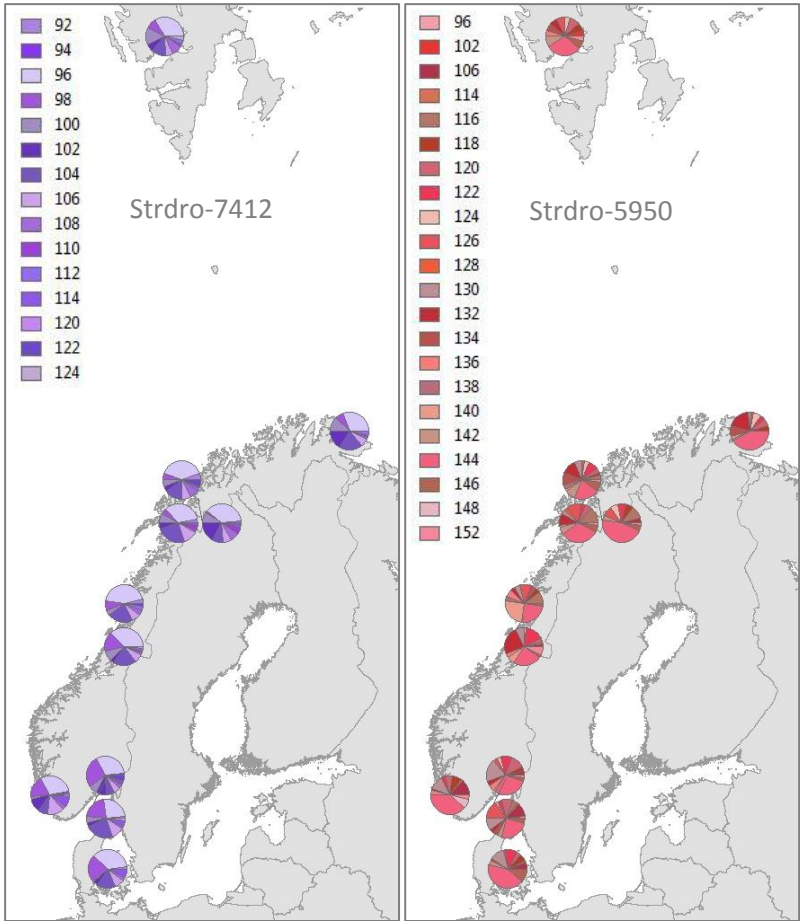

Supplement: 227_2015_2801_MOESM1_ESM.pdf [file 227_2015_2801_MOESM1_ESM.pdf]
